# Supplementary material for: A theoretical approach to understand the inhibition mechanism of steel corrosion with two aminobenzonitrile inhibitors
Source: Royal Society of Chemistry journal article supplement (doi:10.1039/c5ra15173b), 2015-01-01
Supplement: c5ra15173b1.pdf [file c5ra15173b1.pdf]

**:Supplementary File:**

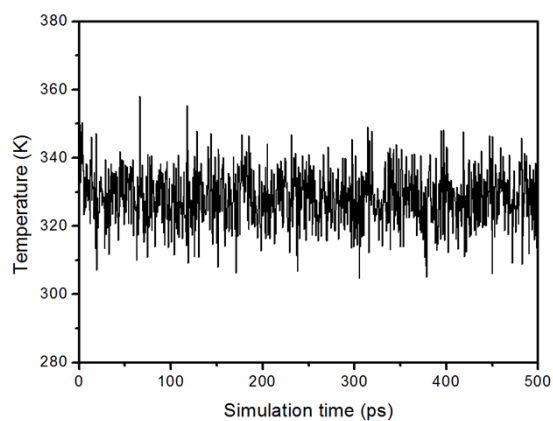

(a)

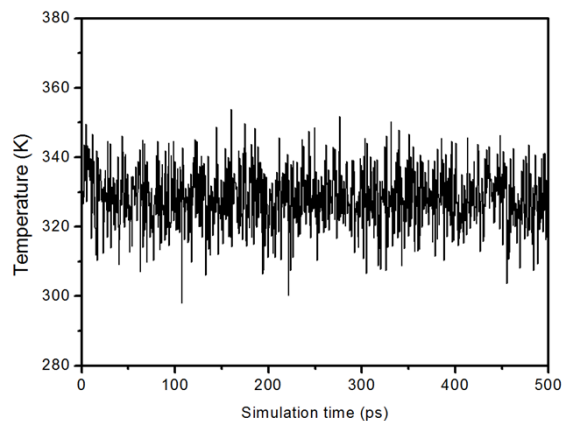

(b)

**Fig. S1** Temperature equilibrium curve obtained from MD simulation for (a) 2-AB and (b) 3-AB at 328 K.

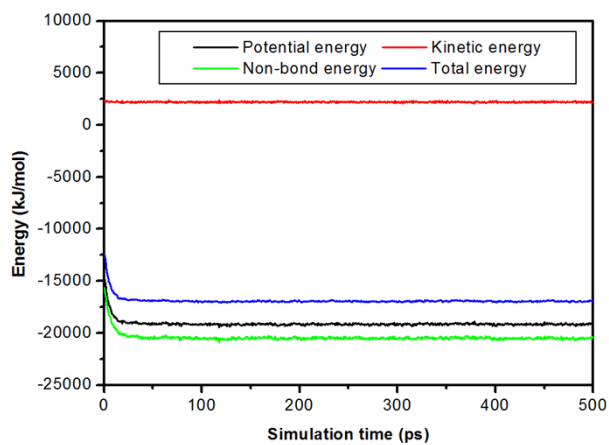

(a)

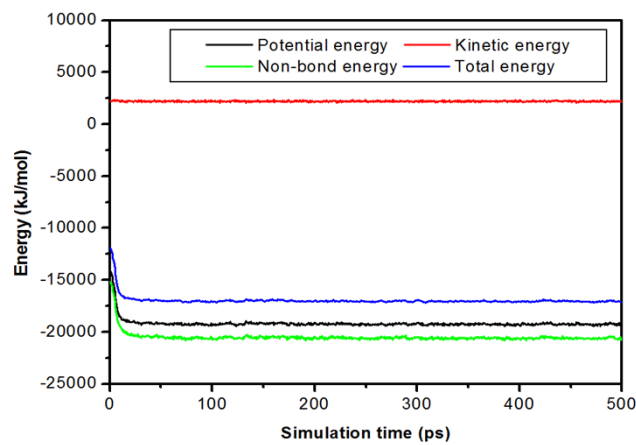

(b)

**Fig. S2** Energy fluctuation curves obtained from MD simulation for (a) 2-AB and (b) 3-AB at 328 K.

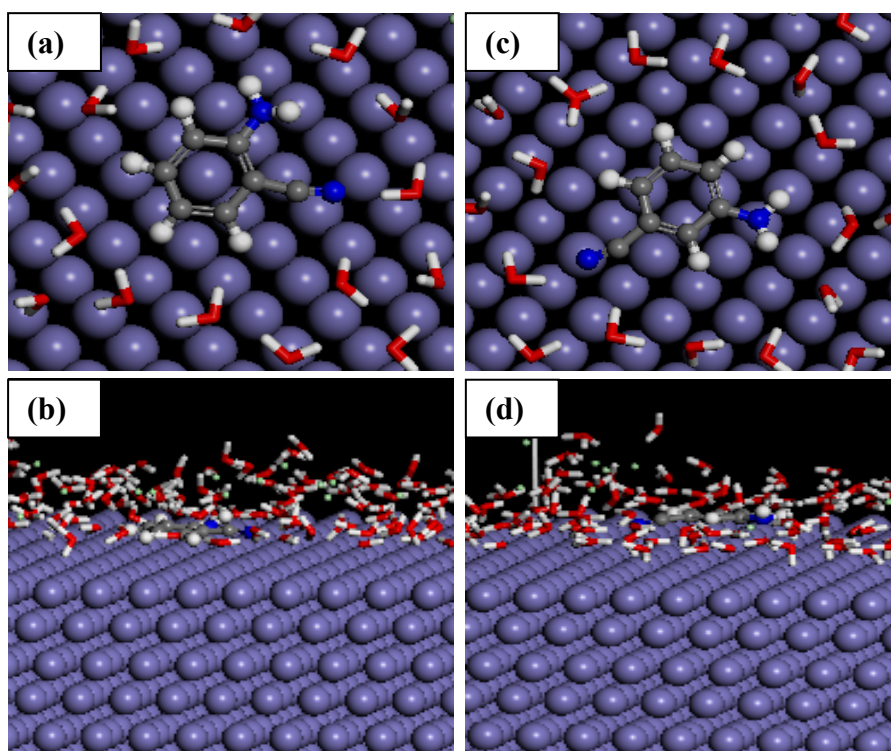

**Fig. S3** Equilibrium adsorption configurations of inhibitors 2-AB (a and b) and 3-AB (c and d) on Fe (1 1 0) surface at 328 K obtained from MD simulations. Top: top view, Bottom: side view.
